# Supplementary material for: Widespread Disulfide Bonding in Proteins from Thermophilic Archaea
Source: Hindawi journal article supplement (doi:10.1155/2011/409156), 2011-01-01
Supplement: f1 [file 409156.f1.pdf]

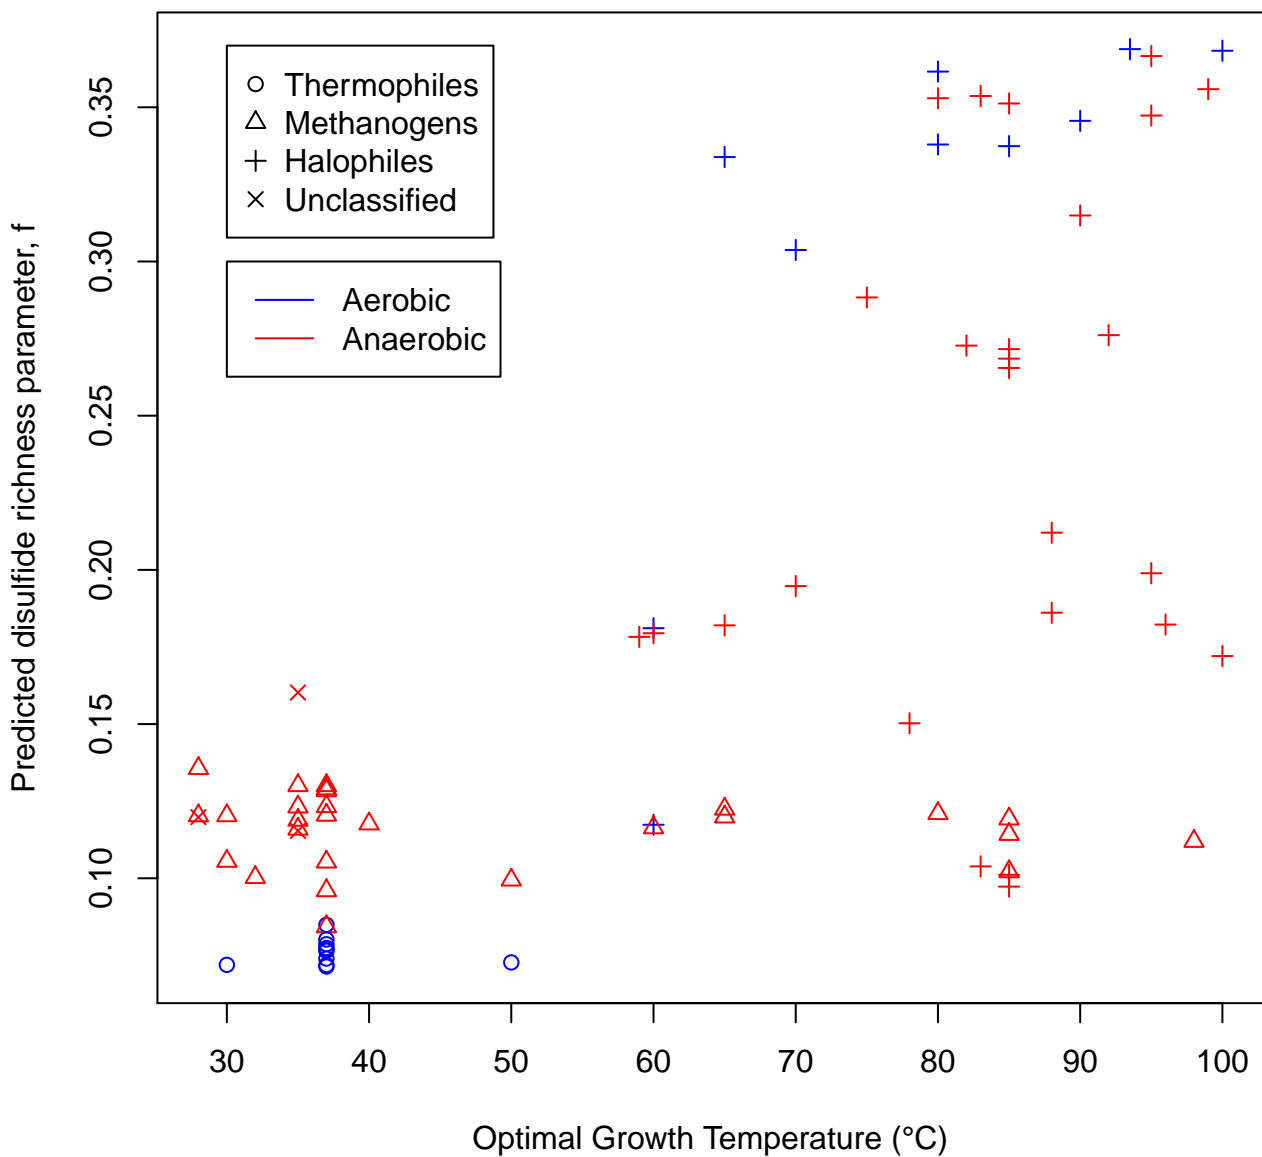

Table

| OrganismID | Organism Name                             | Mapped Cysteines | fraction f | OGT  |
|------------|-------------------------------------------|------------------|------------|------|
| 56636      | Aeropyrum pernix                          | 835              | 0.369      | 93.5 |
| 178306     | Pyrobaculum aerophilum str. IM2           | 1200             | 0.368      | 100  |
| 340102     | Pyrobaculum arsenaticum DSM 13514         | 1192             | 0.367      | 95   |
| 273063     | Sulfolobus tokodaii str. 7                | 1239             | 0.362      | 80   |
| 415426     | Hyperthermus butylicus DSM 5456           | 843              | 0.356      | 99   |
| 397948     | Caldivirga maquilingensis IC-167          | 1148             | 0.354      | 83   |
| 666510     | Acidilobus saccharovorans 345-15          | 748              | 0.353      | 80   |
| 444157     | Thermoproteus neutrophilus V24Sta         | 968              | 0.351      | 85   |
| 384616     | Pyrobaculum islandicum DSM 4184           | 1048             | 0.347      | 95   |
| 410359     | Pyrobaculum calidifontis JCM 11548        | 1114             | 0.346      | 90   |
| 427317     | Sulfolobus islandicus M.14.25             | 1376             | 0.338      | 80   |
| 555311     | Sulfolobus solfataricus 98/2              | 1310             | 0.337      | 85   |
| 399549     | Metallosphaera sedula DSM 5348            | 1249             | 0.334      | 65   |
| 453591     | Ignicoccus hospitalis KIN4/I              | 851              | 0.315      | 90   |
| 2285       | Sulfolobus acidocaldarius                 | 1205             | 0.304      | 70   |
| 228908     | Nanoarchaeum equitans Kin4-M              | 163              | 0.288      | 75   |
| 583356     | Ignisphaera aggregans DSM 17230           | 1235             | 0.276      | 92   |
| 490899     | Desulfurococcus kamchatkensis 1221n       | 858              | 0.273      | 82   |
| 399550     | Staphylothermus marinus F1                | 799              | 0.272      | 85   |
| 591019     | Staphylothermus hellenicus DSM 12710      | 797              | 0.269      | 85   |
| 633148     | Thermosphaera aggregans DSM 11486         | 840              | 0.265      | 85   |
| 368408     | Thermofilum pendens Hrk 5                 | 1061             | 0.212      | 88   |
| 70601      | Pyrococcus horikoshii OT3                 | 915              | 0.199      | 95   |
| 439481     | Aciduliprofundum boonei T469              | 1294             | 0.195      | 70   |
| 593117     | Thermococcus gammatolerans EJ3            | 994              | 0.186      | 88   |
| 272844     | Pyrococcus abyssi GE5                     | 1015             | 0.182      | 96   |
| 69014      | Thermococcus kodakarensis KOD1            | 956              | 0.182      | 65   |
| 273116     | Thermoplasma volcanium GSS1               | 1121             | 0.181      | 60   |
| 523850     | Thermococcus onnurineus NA1               | 964              | 0.179      | 60   |
| 273075     | Thermoplasma acidophilum DSM 1728         | 1105             | 0.178      | 59   |
| 186497     | Pyrococcus furiosus DSM 3638              | 1052             | 0.172      | 100  |
| 374847     | Candidatus Korarchaeum cryptofilum OPF8   | 1192             | 0.160      | 85   |
| 604354     | Thermococcus sibiricus MM 739             | 1118             | 0.150      | 78   |
| 456442     | Methanoregula boonei 6A8                  | 3333             | 0.136      | 28   |
| 2209       | Methanosarcina mazei                      | 3944             | 0.130      | 35   |
| 323259     | Methanospirillum hungatei JF-1            | 4021             | 0.130      | 37   |
| 269797     | Methanosarcina barkeri str. Fusaro        | 4410             | 0.129      | 37   |
| 304371     | Methanocella paludicola SANA E            | 3504             | 0.128      | 37   |
| 410358     | Methanocorpusculum labreanum Z            | 2815             | 0.123      | 37   |
| 2214       | Methanosarcina acetivorans                | 4864             | 0.123      | 35   |
| 187420     | Methanothermobacter thermautotrophicus ΔH | 2148             | 0.122      | 65   |
| 579137     | Methanocaldococcus vulcanius M7           | 2289             | 0.121      | 80   |
| 419665     | Methanococcus aeolicus Nankai-3           | 2349             | 0.120      | 37   |
| 259564     | Methanococcoides burtonii DSM 6242        | 2901             | 0.120      | 20   |
| 521011     | Methanosphaerula palustris E1-9c          | 3400             | 0.120      | 28   |
| 79929      | Methanothermobacter marburgensis str. Mz  | 2110             | 0.120      | 65   |

Table

|                                                     |      |       |    |
|-----------------------------------------------------|------|-------|----|
| 436308 <i>Nitrosopumilus maritimus</i> SCM1         | 1978 | 0.120 | 28 |
| 2190 <i>Methanocaldococcus jannaschii</i>           | 2197 | 0.119 | 85 |
| 368407 <i>Methanoculleus marisnigri</i> JR1         | 3155 | 0.119 | 25 |
| 426368 <i>Methanococcus maripaludis</i> C7          | 2533 | 0.118 | 40 |
| 263820 <i>Picrophilus torridus</i> DSM 9790         | 1210 | 0.117 | 60 |
| 349307 <i>Methanosaeta thermophila</i> PT           | 2397 | 0.116 | 60 |
| 547558 <i>Methanohalophilus mahii</i> DSM 5219      | 2777 | 0.116 | 35 |
| 46770 <i>Cenarchaeum symbiosum</i>                  | 1872 | 0.115 | 35 |
| 573063 <i>Methanocaldococcus infernus</i> ME85      | 2083 | 0.114 | 85 |
| 2320 <i>Methanopyrus kandleri</i>                   | 1768 | 0.112 | 98 |
| 406327 <i>Methanococcus vanniellii</i> SB           | 2416 | 0.106 | 30 |
| 634498 <i>Methanobrevibacter ruminantium</i> M1     | 2346 | 0.105 | 37 |
| 2234 <i>Archaeoglobus fulgidus</i>                  | 2600 | 0.104 | 83 |
| 573064 <i>Methanocaldococcus fervens</i> AG86       | 2046 | 0.102 | 85 |
| 572546 <i>Archaeoglobus profundus</i> DSM 5631      | 2146 | 0.101 | 85 |
| 456320 <i>Methanococcus voltae</i> A3               | 2254 | 0.100 | 32 |
| 644295 <i>Methanohalobium evestigatum</i> Z-7303    | 2403 | 0.099 | 50 |
| 589924 <i>Ferroglobus placidus</i> DSM 10642        | 2333 | 0.097 | 85 |
| 420247 <i>Methanobrevibacter smithii</i> ATCC 35061 | 2125 | 0.096 | 37 |
| 485914 <i>Halomicrobium mukohataei</i> DSM 12286    | 2332 | 0.085 | 37 |
| 339860 <i>Methanosphaera stadtmanae</i> DSM 3091    | 1922 | 0.084 | 37 |
| 2238 <i>Haloarcula marismortui</i>                  | 3019 | 0.080 | 37 |
| 547559 <i>Natrialba magadii</i> ATCC 43099          | 2531 | 0.079 | 37 |
| 543526 <i>Haloterrigena turkmenica</i> DSM 5511     | 2842 | 0.077 | 37 |
| 795797 <i>Halalkalicoccus jeotgali</i> B3           | 2989 | 0.077 | 37 |
| 519442 <i>Halorhabdus utahensis</i> DSM 12940       | 1869 | 0.077 | 37 |
| 348780 <i>Natronomonas pharaonis</i> DSM 2160       | 2217 | 0.074 | 37 |
| 2242 <i>Halobacterium salinarum</i>                 | 1650 | 0.073 | 50 |
| 416348 <i>Halorubrum lacusprofundi</i> ATCC 49239   | 2377 | 0.072 | 30 |
| 362976 <i>Haloquadratum walsbyi</i> DSM 16790       | 2087 | 0.072 | 37 |
| 309800 <i>Haloferax volcanii</i> DS2                | 2941 | 0.071 | 37 |
